# Supplementary material for: Surveillance of SARS-CoV-2 transmission in educational institutions, August to December 2020, Germany
Source: PubMed Central journal article supplement (PMC8503068; doi:10.1017/s0950268821002077), 2021-09-22

### Supplementary Material to Schoeps A, et al. Surveillance of COVID-19 transmission in educational institutions, August to December 2020, Germany

**Supplementary Figure 1:** Time point of PCR testing in 12,804 contact persons to 426 SARS-CoV-2 index cases in educational institutions, Rhineland-Palatinate, 2020

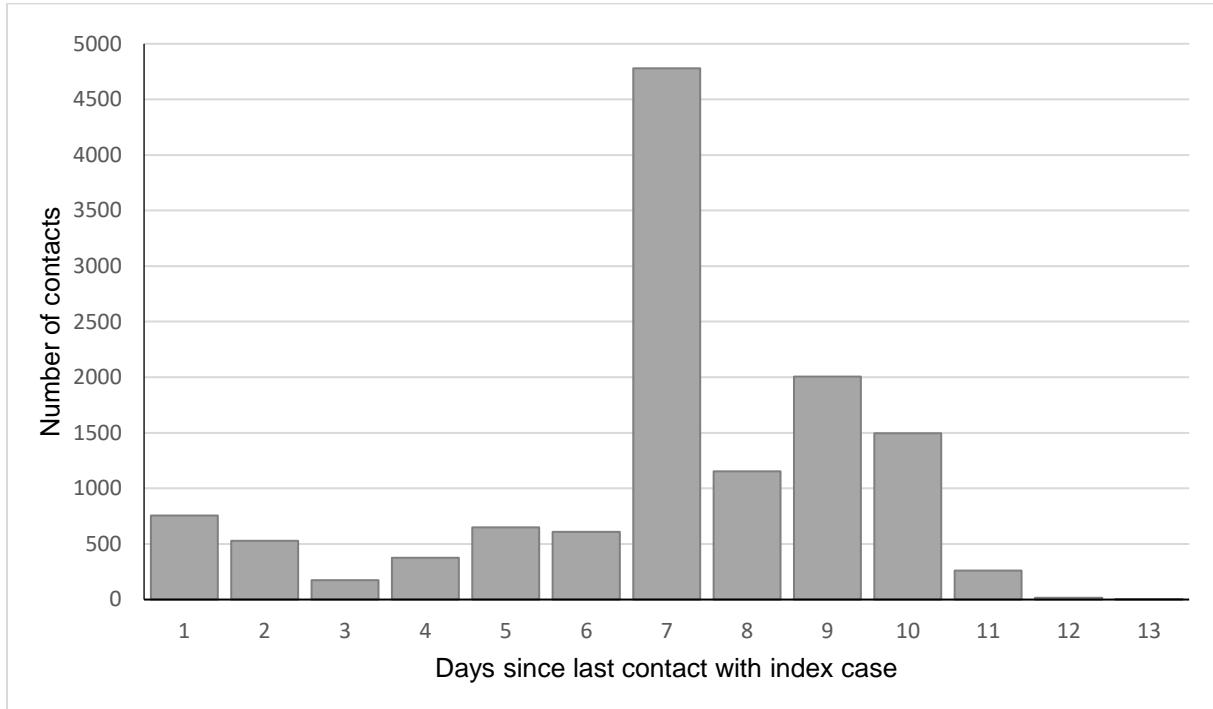

**Supplementary Figure 2:** Frequency of cluster sizes (log-scale) around 784 SARS-CoV-2 index cases in educational institutions, Rhineland-Palatinate, 2020

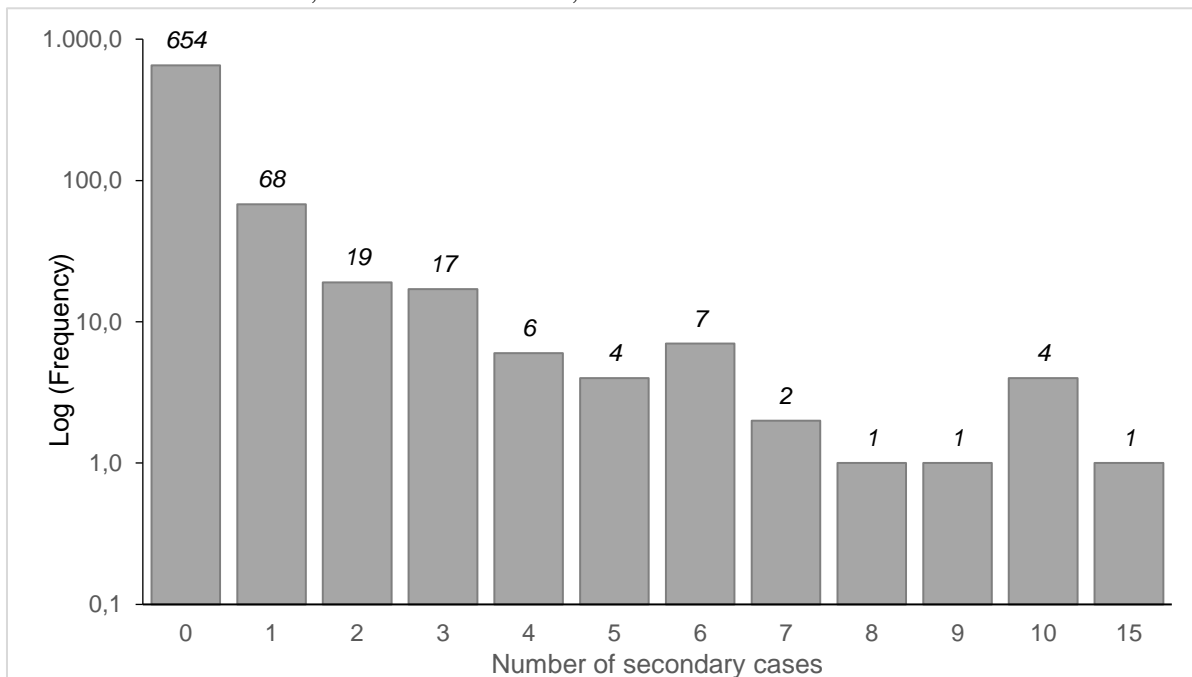

Supplement: S0950268821002077sup001.pdf [file S0950268821002077sup001.pdf]
